# Supplementary material for: Controlled synthesis of wurtzite CuInS2 nanocrystals and their side-by-side nanorod assemblies
Source: Royal Society of Chemistry journal article supplement (doi:10.1039/c0ce00451k), 2011-01-01
Supplement: c0ce00451k.pdf [file c0ce00451k.pdf]

# **Controlled Synthesis of Wurtzite CuInS<sub>2</sub> Nanocrystals and Their Side-by-Side Nanorod Assemblies**

**Xiaotang Lu, Zhongbin Zhuang, Qing Peng,\* and Yadong Li**

\*Department of Chemistry, Tsinghua University, Beijing, 100084, P.R. China. Fax: 86-10-62792798;  
Tel: 86-10-62792798; E-mail: pengqing@mail.tsinghua.edu.cn

## **Electronic Supplementary Information**

## S1. Crystal lattice structure

Normally,  $\text{CuInS}_2$  has three crystalline forms: chalcopyrite, zinc blende and wurtzite. Chalcopyrite is common in natural  $\text{CuInS}_2$ , which has a tetragonal unit cell. When Cu(I) and In(III) distributing equally in the cation sites of chalcopyrite  $\text{CuInS}_2$ , the tetragonal cell could be simplified into cubic cell, that is zinc blende. In the wurtzite phase, sulfur ions are hexagonally close-packed, presenting a nearly fixed structure, while In(III) and Cu(I) are placed randomly through the tetrahedral interstices of the sulfur framework with same occupation possibility to meet the charge balance on the whole.

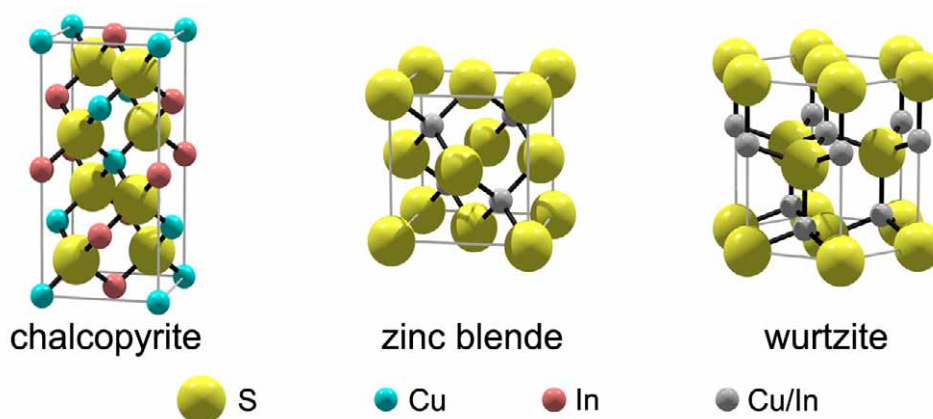

**Fig. S1** Crystal structures of chalcopyrite, zinc blende and wurtzite  $\text{CuInS}_2$ .

## S2. Anneal Process

To test the stability, films of wurtzite CuInS<sub>2</sub> nanocrystals (sample III-2) were put into the furnaces undertaking the anneal process. Heat treatment is necessary in fabricating PV devices to remove the surfactants, which would enhance the performance of devices. The CuInS<sub>2</sub> film was annealed at 400 °C for 2 hours under N<sub>2</sub> flows. It is observed that no phase transition has happened. The XRD pattern could still be indexed as wurtzite CuInS<sub>2</sub> (**Fig. S2**).

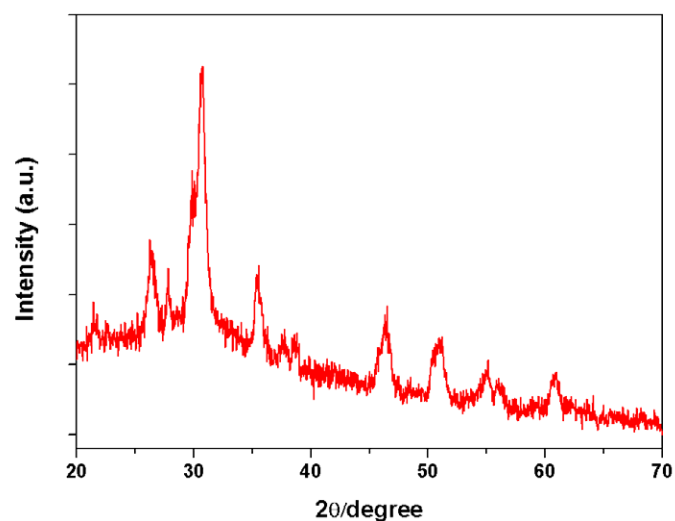

**Fig. S2** XRD pattern of wurtzite CuInS<sub>2</sub> film after annealing

### S3. Assemble Nanorods

The experimental setup in this section is extremely simple (**Fig. S3**). It is necessary to avoid shaking the experimental setup after putting the substrate to the container, but exposure to the air will not affect the arrangement of nanorods.

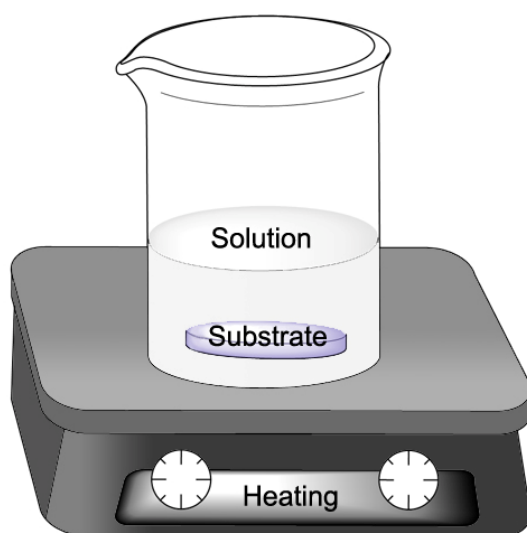

**Fig. S3** Schematic diagram of the equipment.

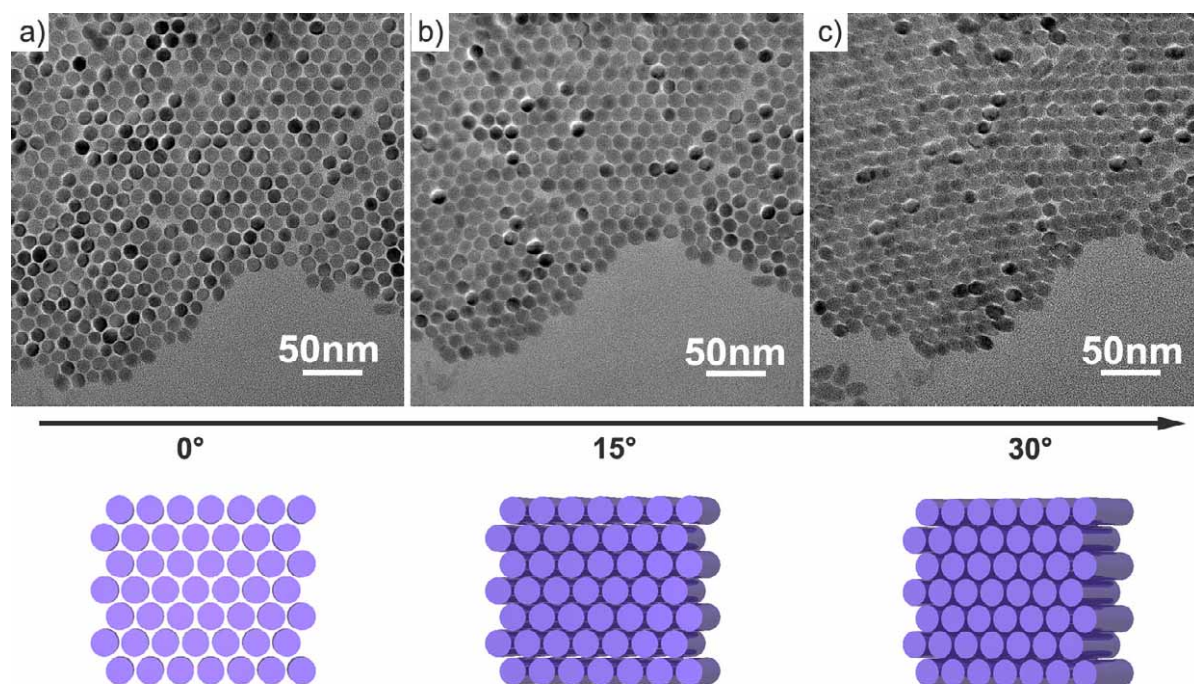

**Fig. S4** (a)TEM images of perpendicularly aligned nanorods, (b)after tilted by 15°, (c)after tilted by 30°, and schematics of tilting process.

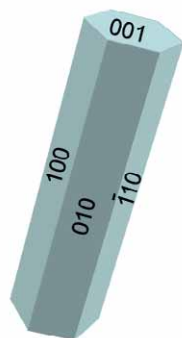

**Fig. S5** Schematic diagram of a single CuInS<sub>2</sub> nanorod
